# Supplementary material for: Synthesis and catalytic application of nanorod-like FER-type zeolites
Source: Royal Society of Chemistry journal article supplement (doi:10.1039/d1ta06596c), 2021-01-01
Supplement: d1ta06596c1.pdf [file d1ta06596c1.pdf]

## Supporting Information for

### Synthesis and catalytic application of nanorod-like FER-type zeolite

Weijiong Dai <sup>a,b</sup>, Valérie Ruaux<sup>b</sup>, Xin Deng<sup>a</sup>, Wenshu Tai<sup>a</sup>, Guangjun Wu<sup>a\*</sup>, Naijia Guan<sup>a</sup>, Landong Li<sup>a</sup>,  
Valentin Valtchev <sup>b\*</sup>

<sup>a</sup>School of Materials Science and Engineering & National Institute for Advanced Materials, Nankai University, Tianjin 300350, P. R. China;

<sup>b</sup>Normandie Univ, ENSICAEN, UNICAEN, CNRS, Laboratoire Catalyse et Spectrochimie, 14050 Caen, France.

\*Corresponding Authors

Email: wuguangjun@nankai.edu.cn; valentin.valtchev@ensicaen.fr

**This PDF contains:**

Figure S1-7; Table S1-3

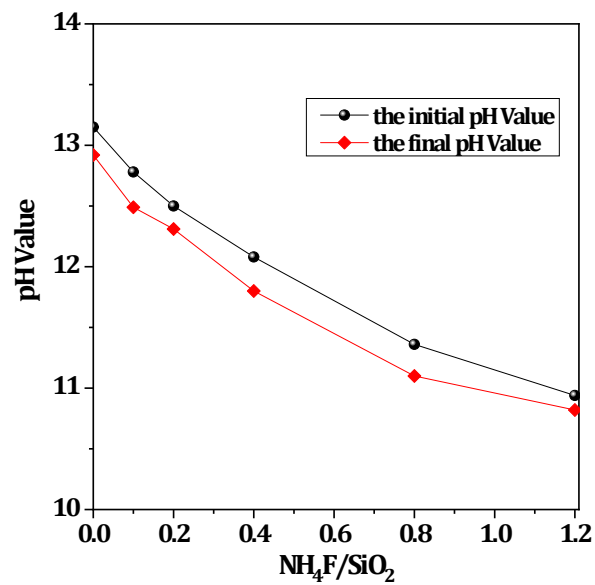

**Figure S1.** Variation of the pH value as a function of NH<sub>4</sub>F concentration in the synthesis system.

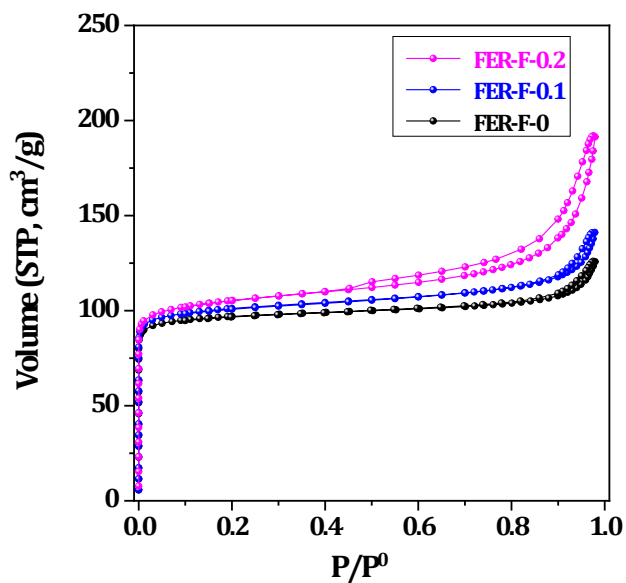

**Figure S2.** Nitrogen adsorption/desorption isotherms of as-synthesized FER samples.

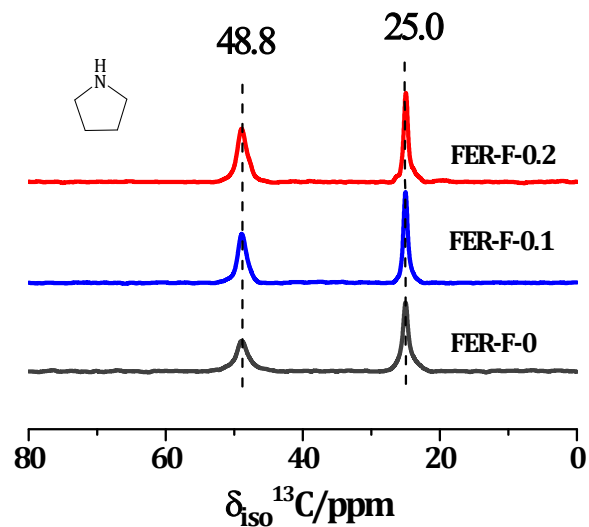

**Figure S3.**  $^{13}\text{C}$  CP MAS NMR spectra of as-synthesized three different FER zeolites.

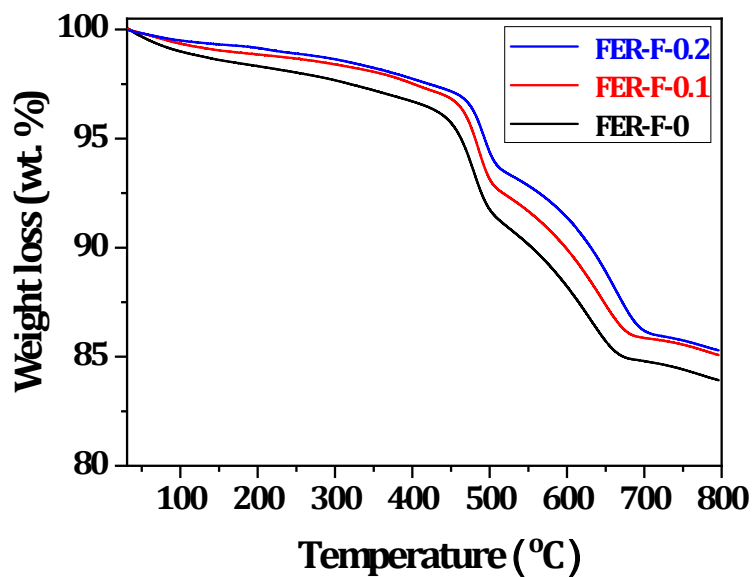

**Figure S4.** TG curves of as-synthesized FER zeolite samples: FER-F-0, FER-F-0.1 and FER-F-0.2.

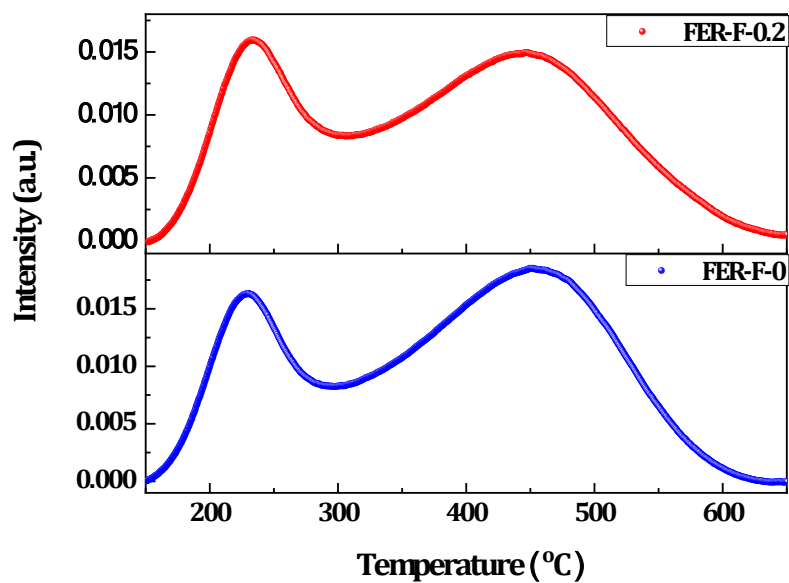

**Figure S5.**  $\text{NH}_3$ -TPD profiles of as-synthesized samples FER-F-0 and FER-F-0.2.

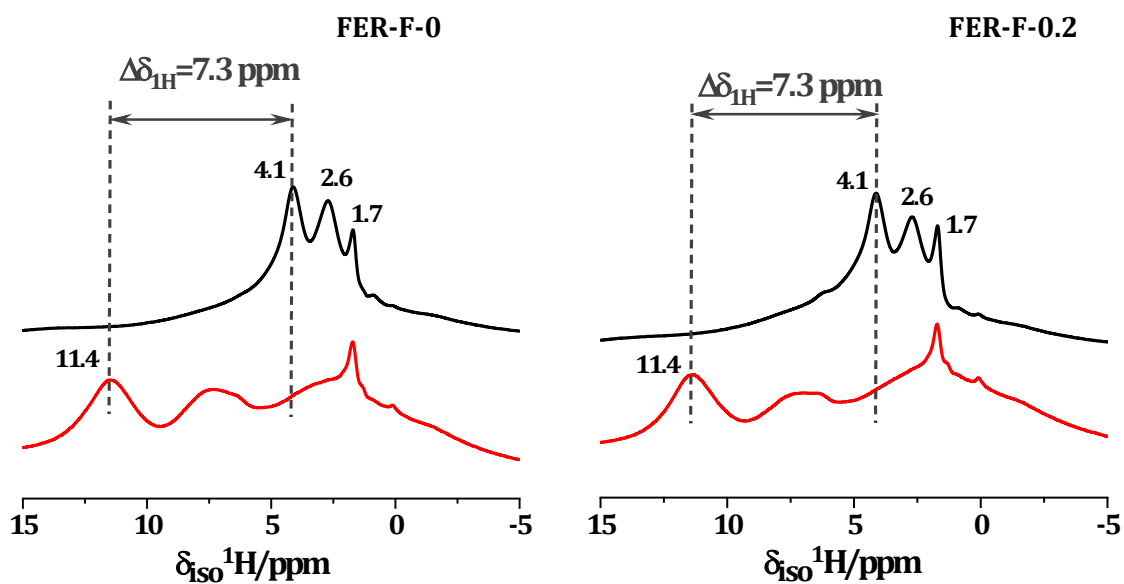

**Figure S6.**  $^1\text{H}$  MAS NMR spectra of the dehydrated FER samples recorded before (black curves) and after (red curves) loading with  $\text{D}_3$ -acetonitrile.

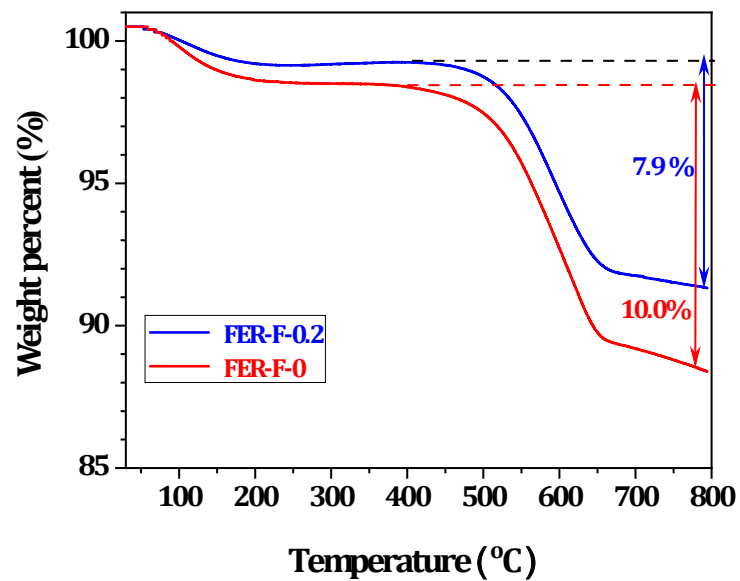

**Figure S7.** TGA curves of spent FER-F-0 and FER-F-0.2 catalysts used in the 1-butene skeletal isomerization.

**Table S1.** Molar composition of the initial mixtures and crystallization conditions of synthesized FER-type zeolites.

| Sample    | SiO <sub>2</sub> | Al <sub>2</sub> O <sub>3</sub> | SDA | Na <sub>2</sub> O | H <sub>2</sub> O | NH <sub>4</sub> F | T (°C) | Phase    |
|-----------|------------------|--------------------------------|-----|-------------------|------------------|-------------------|--------|----------|
| FER-F-0   | 1                | 0.05                           | 0.6 | 0.08              | 20               | 0                 | 180    | FER      |
| FER-F-0.1 | 1                | 0.05                           | 0.6 | 0.08              | 20               | 0.1               | 180    | FER      |
| FER-F-0.2 | 1                | 0.05                           | 0.6 | 0.08              | 20               | 0.2               | 180    | FER      |
| FER-F-0.4 | 1                | 0.05                           | 0.6 | 0.08              | 20               | 0.4               | 180    | FER      |
| FER-F-0.8 | 1                | 0.05                           | 0.6 | 0.08              | 20               | 0.8               | 180    | FER+ MTN |
| FER-F-1.2 | 1                | 0.05                           | 0.6 | 0.08              | 20               | 1.2               | 180    | FER+ MTN |

**Table S2.** Textural properties of as-synthesized FER samples.

| Samples   | S <sub>BET</sub> <sup>a</sup><br>(m <sup>2</sup> /g) | S <sub>ext</sub> <sup>b</sup><br>(m <sup>2</sup> /g) | V <sub>micro</sub> <sup>b</sup><br>(cm <sup>3</sup> /g) | V <sub>total</sub> <sup>c</sup><br>(cm <sup>3</sup> /g) | Si/Al <sup>d</sup> |
|-----------|------------------------------------------------------|------------------------------------------------------|---------------------------------------------------------|---------------------------------------------------------|--------------------|
| FER-F-0   | 383                                                  | 56                                                   | 0.13                                                    | 0.19                                                    | 8.7                |
| FER-F-0.1 | 397                                                  | 67                                                   | 0.13                                                    | 0.22                                                    | 9.3                |
| FER-F-0.2 | 409                                                  | 86                                                   | 0.13                                                    | 0.30                                                    | 9.5                |

<sup>a</sup> determined by the multi-point BET method.

<sup>b</sup> calculated by the t-plot method.

<sup>c</sup> the volume adsorbed at  $P/P^0 = 0.97$ .

<sup>d</sup> determined by the ICP.

**Table S3.** Coke amount, average coke accumulation rate ( $R_{\text{coke}}$ ) during the the 1-butene skeletal isomerization over FER zeolite catalysts under study, determined for TOS = 1440 min.

| samples   | Coke(wt%) | $R_{\text{coke}}$ (mg/h) |
|-----------|-----------|--------------------------|
| FER-F-0   | 10.0      | 0.463                    |
| FER-F-0.2 | 7.9       | 0.357                    |
